# Supplementary material for: First-in-Class ERK1/2 Inhibitor Ulixertinib (BVD-523) in Patients with MAPK Mutant Advanced Solid Tumors: Results of a Phase I Dose-Escalation and Expansion Study
Source: Oxford University Press journal article supplement (doi:10.1158/2159-8290.cd-17-1119), 2017-12-15
Supplement: 21598290cd171119-sup-190369_1_supp_4369773_nyn1ns.docx [file 21598290cd171119-sup-190369_1_supp_4369773_nyn1ns.docx]

| **Mutation** | **Cancer Type** |
| --- | --- |
| ***BRAF* Mutations** |  |
| **V600E** | Melanoma |
| Thyroid |
| Glioblastoma |
| Colorectal |
| NSCLC |
| Papillary Thyroid |
| **V600K** | Melanoma |
| **V600R** | Melanoma |
| **G469A** | Angiosarcoma |
| SCC (Head and Neck) |
| Appendiceal |
| Small Cell Lung Cancer |
| Small Bowel Cancer |
| NSCLC |
| **G469V** | Adenoid Cystic Carcinoma |
| **D594N** | Squamous Cell Carcinoma |
| Cholangiocarcinoma |
| Salivary Gland Carcinoma |
| Glioblastoma |
| NSCLC |
| **D594G** | Vaginal |
| Glioblastoma |
| **BRAF K601E** | Prostate |
| NSCLC |
| **T599 Duplication** | Colorectal |
| NSCLC |
| **NFIC-BRAF Fusion** | Melanoma |
| **Exon 15 splice variant** | Colorectal |
| **F247L** | Colorectal |
| **G466V** | NSCLC |
| **L485W** | Gallbladder |
| **L597R** | Colorectal |
| **L597Q** | NSCLC |
| **BRAF-AGAP3 Rearrangement** | Colorectal |
| ***NRAS* Mutations** |  |
| **Q61K** | Melanoma |
| **G13D** |
| **G13R** |
| **G13V** |
| **Q61H** |
| **Q61L** |
| **Q61R** |
| **Nonspecific** |
| ***MAP2K1* Mutations** |  |
| **Q56** | Colon Adenocarcinoma |
| **Y130H** | Lung Cancer |
| **P321H** | Mesothelioma |
| **K57N** | Melanoma |
| **G128D** | Urachal Carcinoma |
| **D67N** | Ileal Adenocarcinoma |
| **K57T** | Duodenal Adenocarcinoma |
| **Nonspecific** | GIST |
