# Supplementary material for: First-in-Class ERK1/2 Inhibitor Ulixertinib (BVD-523) in Patients with MAPK Mutant Advanced Solid Tumors: Results of a Phase I Dose-Escalation and Expansion Study
Source: Oxford University Press journal article supplement (doi:10.1158/2159-8290.cd-17-1119), 2017-12-15
Supplement: 21598290cd171119-sup-190369_1_supp_4369774_xyx1ns.docx [file 21598290cd171119-sup-190369_1_supp_4369774_xyx1ns.docx]

| Starting Dose (mg, BID) | DLT Frequency (%) | DLT Description |
| --- | --- | --- |
| 10 | 0/1 |  |
| 20 | 0/1 |  |
| 40 | 0/1 |  |
| 75 | 0/1 |  |
| 150 | 0/1 |  |
| 300 | 0/4 |  |
| 600 | 1/7 (14) | - Grade 3 rash |
| 900 | 2/7 (29) | - Grade 3 pruritus, Grade 3 elevated ALT, Grade 3 elevated AST - Grade 3 diarrhea, Grade 3 vomiting, Grade 3 dehydration, Grade 3 elevated creatinine |
| 750 | 2/4 (50) | - Grade 3 rash, Grade 2 diarrhea - Grade 2 hypotension, Grade 2 anemia, Grade 1 elevated creatinine |
