# Supplementary material for: First-in-Class ERK1/2 Inhibitor Ulixertinib (BVD-523) in Patients with MAPK Mutant Advanced Solid Tumors: Results of a Phase I Dose-Escalation and Expansion Study
Source: Oxford University Press journal article supplement (doi:10.1158/2159-8290.cd-17-1119), 2017-12-15
Supplement: 21598290cd171119-sup-190369_1_table_4369772_wyw1ns.docx [file 21598290cd171119-sup-190369_1_table_4369772_wyw1ns.docx]

|  | | Cmax (ng/mL) ± SD | |
| --- | --- | --- | --- |
| Dose (mg) | N | Day 1 | Day 15 |
| 10 | 1 | 48.2 | 45.7 |
| 20 | 1 | 14.9 | 15.8 |
| 40 | 1 | 100 | 191 |
| 75 | 1 | 133 | 326 |
| 150 | 1 | 216 | 459 |
| 300 | 4a | 765 ± 234 | 586 ± 257 |
| 600b | 7c | 1110 ± 589 | 2750 ± 1740 |
| 750 | 4a | 1450 ± 539 | 2290 ± 1790 |
| 900 | 7d | 1430 ± 1010 | 1720 ± 328 |

a n=3 on Day 15

b number of subjects for Day 15 at the 600 mg dose level includes 2 subjects who started Day 1 dosing at 900 mg and were later reduced to 600 mg

c n=8 on Day 15

d n=4 on Day 15
